# Supplementary material
Source: HighWire-hosted journal article supplement (https://erj.ersjournals.com/content/57/3/2100189)
Supplement: inline-supplementary-material-1 [file inline-supplementary-material-1.pdf]

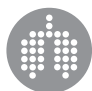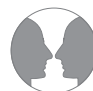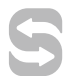

SHAREABLE PDF

# Reply: Fixed breathing protocols in multiple-breath-washout testing: truly an option in children?

Sylvia Verbanck<sup>1</sup>, Daniel Schuermans <sup>1</sup>, Manuel Paiva<sup>2</sup>, Paul D. Robinson<sup>3,4</sup> and Eef Vanderhelst <sup>1,4</sup>

**Affiliations:** <sup>1</sup>Respiratory Division, University Hospital UZ Brussel, Vrije Universiteit Brussel, Brussels, Belgium. <sup>2</sup>Respiratory Division, University Hospital Erasme, Université Libre de Bruxelles, Brussels, Belgium. <sup>3</sup>Dept of Respiratory Medicine, The Children's Hospital at Westmead, Sydney, Australia. <sup>4</sup>Contributed equally.

**Correspondence:** Sylvia Verbanck, Respiratory Division, University Hospital UZ Brussel, Laarbeeklaan 101, 1090 Brussels, Belgium. E-mail: sylvia.verbanck@uzbrussel.be

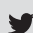

@ERSpublications

**Adult studies point to two sources of lung clearance index variability that could be explored to improve LCI sensitivity** <https://bit.ly/36oRJ1I>

**Cite this article as:** Verbanck S, Schuermans D, Paiva M, *et al.* Reply: Fixed breathing protocols in multiple-breath-washout testing: truly an option in children?. *Eur Respir J* 2021; 57: 2100189 [<https://doi.org/10.1183/13993003.00189-2021>].

This single-page version can be shared freely online.

*Reply to A-C. Kentgens and co-workers:*
